# Supplementary material for: A Supportive Role of Mesenchymal Stem Cells on Insulin-Producing Langerhans Islets with a Specific Emphasis on The Secretome
Source: MDPI journal article supplement (doi:10.3390/biomedicines11092558), 2023-09-18
Supplement: s1 [file s1]

**A**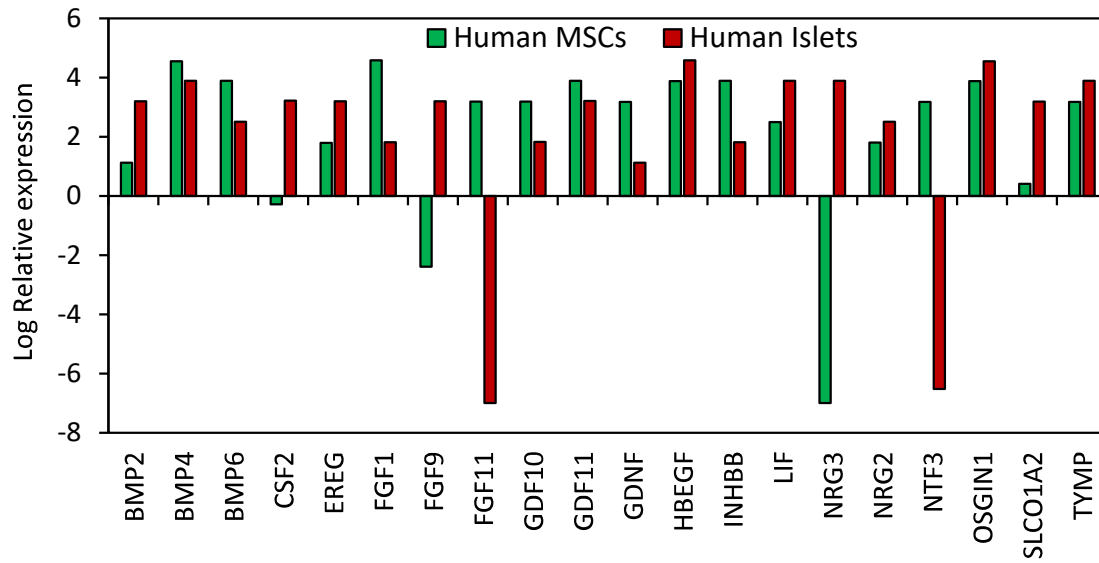**B**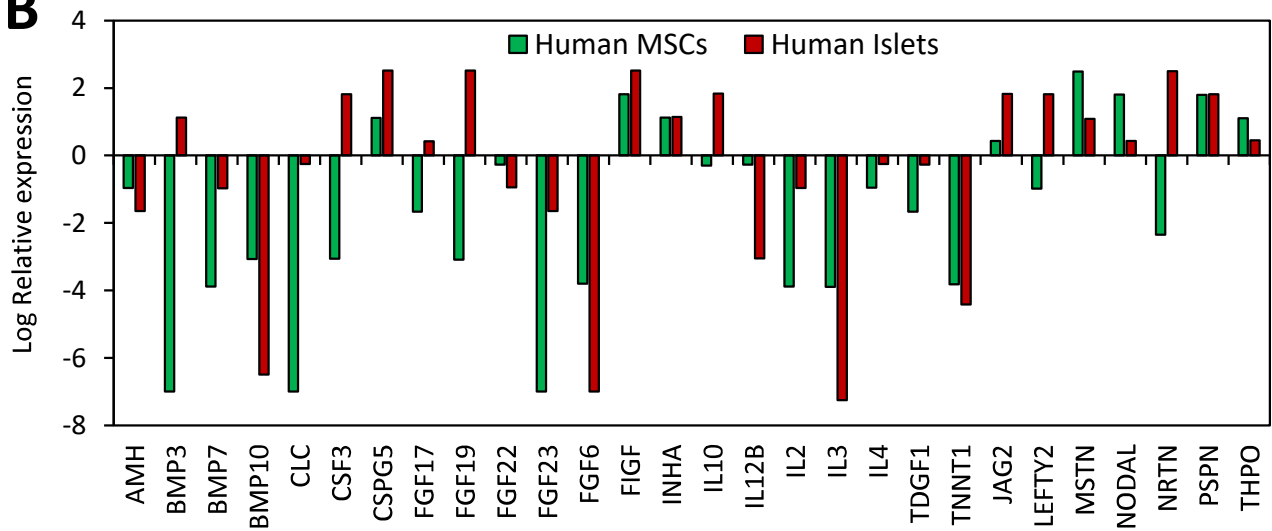

**Supplementary Figure S1. A-B.** Genes expressed at low and very low levels in human MSCs and human islets according to the human growth factor RT Profiler PCR Array.

## Supplementary Material and Methods

### Cell culture

Human islets were obtained from PRODO Laboratories Inc. (Irvine, California, USA) and were incubated overnight in CMRL-1066 (Biological Industries, Beth HaEmek, Israel) supplemented with 10% heat-inactivated fetal calf serum (FCS) (Biological Industries, Beth HaEmek, Israel), 2 mM L-glutamine, 1 mM sodium pyruvate, non-essential amino acids, and 10 U/mL penicillin, 100 µg/mL streptomycin (Biological Industries, Beth HaEmek, Israel), and 50 µg/mL gentamicin (Sigma, St. Louis, USA). Human bone marrow-derived mesenchymal stem cells (MSCs) were obtained from Lonza (Catalog number PT-2501, Walkersville, MD, USA) and cultivated in low glucose DMEM (Biological Industries, Beth HaEmek, Israel) supplemented with 10% heat-inactivated FCS, 2 mM L-glutamine, 1 mM sodium pyruvate, non-essential amino acids and penicillin-streptomycin. All cell cultures were incubated at 37 °C in a humidified incubator supplemented with 5% CO<sub>2</sub>.

### DNA Microarrays

The human growth factor RT Profiler PCR Array (PAHS-041A, Qiagen, Maryland, USA) was used according to the manufacturer's instructions to profiling 84 genes related to growth factors and cytokines in human MSCs and human islets.
